# Supplementary material for: Roles of the different components of magnesium chelatase in abscisic acid signal transduction
Source: PubMed Central journal article supplement (PMC3472068; doi:10.1007/s11103-012-9965-3), 2012-09-27
Supplement: 11103_2012_9965_MOESM1_ESM.pdf [file 11103_2012_9965_MOESM1_ESM.pdf]

# Supplementary data

Du S.Y. *et al.*, Roles of the different components of Mg-chelatase in abscisic acid signal transduction.

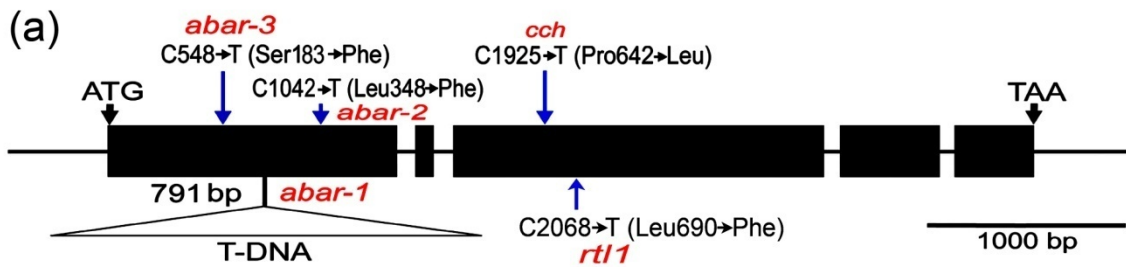

The map of the *abar* mutant alleles is shown above.

(b) Summary of the ABA-related phenotypes of the mutant alleles

| Mutant allele          | Seed germination       | Early seedling growth  | Stomatal movement        |
|------------------------|------------------------|------------------------|--------------------------|
| <i>abar-1</i> (lethal) | ---                    | ---                    | ---                      |
| <i>abar-2</i>          | ABA insensitive        | Weakly ABA insensitive | Wild-type                |
| <i>abar-3</i>          | ABA hypersensitive     | ABA insensitive        | Wild-type                |
| <i>cch</i>             | Weakly ABA insensitive | Weakly ABA insensitive | Strongly ABA insensitive |
| <i>rtl1</i>            | Weakly ABA insensitive | Wild-type              | Strongly ABA insensitive |

**Supplementary Fig. 1** The identified mutant alleles of *CHLH/ABAR* gene and summary of their ABA-related phenotypes. (a) Diagram showing the locations of the *abar-1*, *abar-2*, *abar-3*, *cch* and *rtl1* mutations in the *CHLH/ABAR* genomic DNA (modified from Wu et al., 2009). (b) Summary of the ABA-related phenotypes of these mutant alleles.

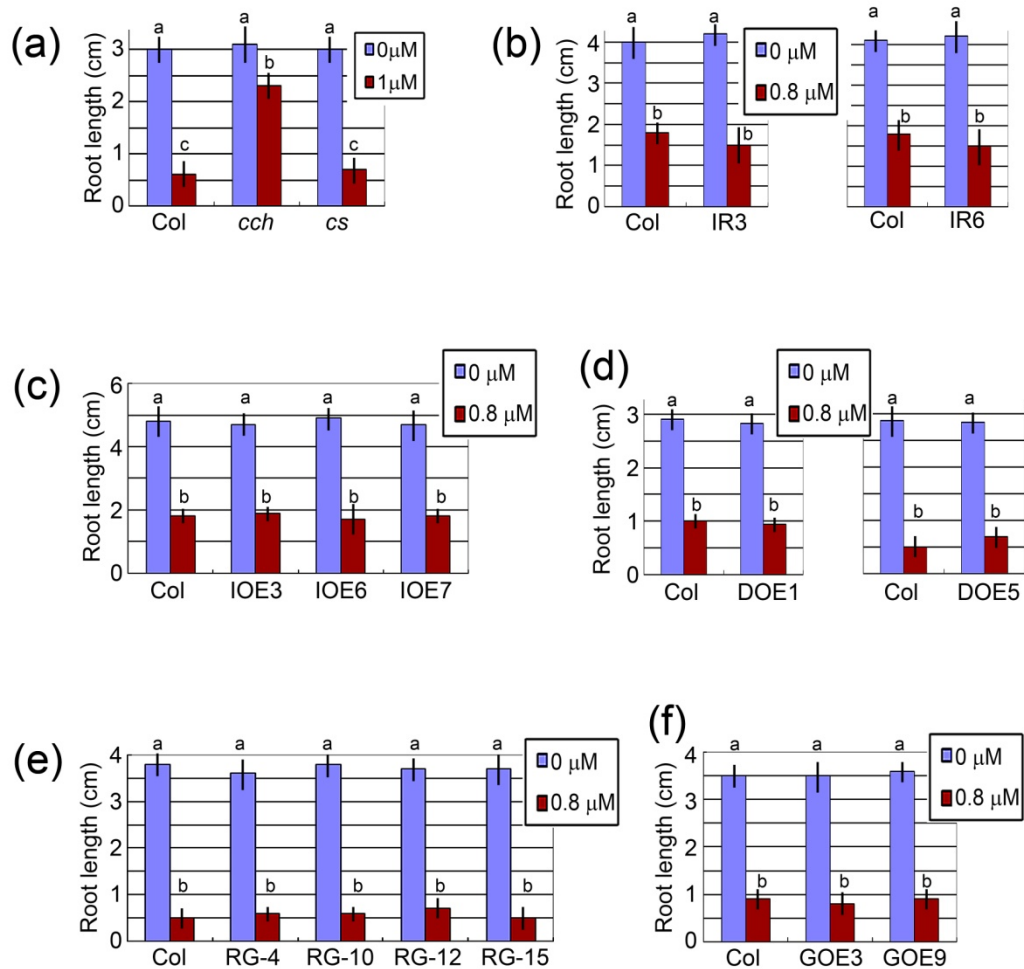

**Supplementary Fig. 2** Root length of *cch*, *cs* mutants and different transgenic lines in ABA-containing medium. (a) The data for *cch* and *cs* mutants. For corresponding photos of seedling growth, see Fig. 4c. (b) The data for the *CHLI*-RNAi-transgenic lines IR3 and IR6. For corresponding photos of seedling growth, see Fig. 4d. (c) The data for the *CHL1*-overexpression transgenic lines IOE3, IOE6 and IOE7. For corresponding photos of seedling growth, see Fig. 4e. (d) The data for the *CHLD*-overexpression transgenic lines DOE1 and DOE5. For corresponding photos of seedling growth, see Fig. 6c. (e) The data for the *GUN4*-RNAi-transgenic lines RG-4, RG-10, RG12 and RG15. For corresponding photos of seedling growth, see Fig. 7c. (f) The data for the *GUN4*-overexpression transgenic lines GOE3 and GOE9. For corresponding photos of seedling growth, see Fig. 7d.

Values are the means  $\pm$  SE from three independent experiments and different letters indicate significant differences at  $P < 0.05$  (Duncan's multiple range test). The experimental conditions are the same as described in the corresponding figures where the photos of the seedlings growth are presented (Fig. 4, 6, or 7).

|             |                                                                                                |      |
|-------------|------------------------------------------------------------------------------------------------|------|
| Arabidopsis | MASLVVSPPTLSTSKAEHLSSLTNSTK..HSFLRKKHRSTPKPAKSFVKVSAVSGNGLFTQINPEVRRRIVPIKRDNVPT.....VKIVY     | 82   |
| Tobacco     | MASLVVSPPTLSPNSKVEHLSSISQKHFLHSFLPKKINPTY.SKSPKKFCNAIGNGLFTQITQEVRRRIVPENTQGLAT.....VKIVY      | 83   |
| Barley      | MASLVVSPPTATGAKQKARGPRPAPLHSLFLLTRG.....RGRRTA..IRCAVAGNGLFTQITNPDPVRRVVPAAE.....RGLPRVKVY     | 76   |
| Rice        | MASLVVSPPTTATGQKKGAFV..PLHSFLLSRPQAAGARGRAAAAAAIRCVAAGNGLFTQITKPEVRRVVPPEGASRRVPRVKVY          | 88   |
| Soybean     | MASLVVSPPTLSPKPDQLHSLAQKHLVLSFLPKKANYNGSSKSSLRVCAVIGNGLFTQITQEVRRRIVPENDQNLPT.....VKIVY        | 84   |
| Arabidopsis | VVLEAQYQSSLSEAVQSLNKTSRFAS.YEVVGYLVEELRDKNTYNNFCEDLKDANIFIGSLIFVEELAKVKDAVEKERDRMDAVLVFPS      | 171  |
| Tobacco     | VVLEAQYQSSLTAAVQTLNKNQGPFAS.FEVVGYLVEELRDEITYKMFCKDLEDANVFIGSLIFVEELAKVKSAVEKERDRMDAVLVFPS     | 172  |
| Barley      | VVLEAQYQSSVTAANADPRRAAEFEVVGVLVEELRDADTYAAFCDVAANVFIGSLIFVEELAKVVRDAVAKHRDRMDAVLVFPS           | 166  |
| Rice        | VVLEAQYQSSVTAARELNADPRRAAGFEVVGVLVEELRDEITYKTFCADLADANVFIGSLIFVEELAKVKDAVEKERDRMDAVLVFPS       | 178  |
| Soybean     | VVLEAQYQSSITAAVIALNSKRKHAS.FEVVGYLVEELRDAEITYKTFCKDLEDANIFIGSLIFVEELAKVKAVEKERDRMDAVLVFPS      | 173  |
| Arabidopsis | MPEVMRLNLKGSFSMSQLGQSKSPFFQLFKRKKQGSAGFADSMKLVRTLTPKVLKYLPSDKAQDARLYILSLQFWLGGSDPNLQNFVKMI     | 261  |
| Tobacco     | MPEVMRLNLKGSFSMSQLGQSKSPFFQLFKRKKPSSAGFSDQMLKLVRTLTPKVLKYLPSDKAQDARLYILSLQFWLGGSDPNLQNFVKMI    | 262  |
| Barley      | MPEVMRLNLKGSFSMAQLGQSKSPFFQLFKRKKRSGFADSMKLVRTLTPKVLKYLPSDKAQDARLYILSLQFWLGGSDPNLQNFVKMI       | 256  |
| Rice        | MPEVMRLNLKGSFSMSQLGQSKSPFFQLFKR..KNSGCFADSMKLVRTLTPKVLKYLPSDKAQDARLYILSLQFWLGGSDPNLQNFVKMI     | 267  |
| Soybean     | MPEVMRLNLKGSFSMSQLGQSKSPFFQLFKRKKQGSAGFADSMKLVRTLTPKVLKYLPSDKAQDARLYILSLQFWLGGSDPNLQNFVKMI     | 263  |
| Arabidopsis | SGSYVPALGKGVKTEVSDPVLFLDTGIWHPLAPTMYDDVKEYLNWYDTRRDANDRKNPEAPVI GLVLQRSHIVTGDDGHYVAVIMELEAK    | 351  |
| Tobacco     | SGSYVPALGKMKIDVSDPVLFLDTGIWHPLAPCMYDDVKEYLNWYATRRDANEKLSNAPVI GLVLQRSHIVTGDDGHYVAVIMELEAK      | 352  |
| Barley      | AVSYVPALGADIRVNDPVLFLDTGIWHPLAPTMYDDVKEYLNWYDTRRDANDRKNPEAPVI GLVLQRSHIVTGDDGHYVAVIMELEAK      | 346  |
| Rice        | AVSYVPALGKDKVDDPVLFLDAGIWHPLAPTMYDDVKEYLNWYDTRRDANDRKNPEAPVI GLVLQRSHIVTGDDGHYVAVIMELEAK       | 357  |
| Soybean     | SGSYVPALGKGVKTEVSDPVLFLDTGIWHPLAPCMYDDVKEYLNWYDTRRDANEKLSNAPVI GLVLQRSHIVTGDDGHYVAVIMELEAK     | 353  |
| Arabidopsis | GAKVPIFAGGLDFSGPVEKVFVDFVSKQPIVNSAVSLTGFALVGGPARQDHPRA TEALMKLDVPIYI VALPLVQTTTEEWLNSTLGLHPI   | 441  |
| Tobacco     | GAKVPIFAGGLDFSRPIERYFIDITKPKFVNSVITSLGFAVGGPARQDHPRA TEALMKLDVPIYI VALPLVQTTTEEWLNSTLGLHPI     | 442  |
| Barley      | GAKVPIFAGGLDFSGPIERYLVDFITKPKFVNAVSVLTFGFAVGGPARQDHPKATAALMKLDVPIYI VALPLVQTTTEEWLNSTLGLHPI    | 436  |
| Rice        | GAKVPIFAGGLDFSGPTQRYLVDFITKPKFVNAVSVLTFGFAVGGPARQDHPKATAALMKLDVPIYI VALPLVQTTTEEWLNSTLGLHPI    | 447  |
| Soybean     | GAKVPIFAGGLDFSGPVEKVFIDITKPKFVNSVSLTGFALVGGPARQDHPRAVEALMKLDVPIYI VALPLVQTTTEEWLNSTLGLHPI      | 443  |
| Arabidopsis | QVALQVALPELDGMEPIVFAGRDPRTEGK.....SHALHKRVEQLCIRAIRWCELKRRKTKAEKKLAITVFSFPDPKGNVGTAAVYLVNFAS   | 526  |
| Tobacco     | QVALQVALPELDGMEPIVFAGRDPRTEGK.....SHALHKRVEQLCIRAIRWCELKRRKTKAEKKLAITVFSFPDPKGNVGTAAVYLVNFAS   | 527  |
| Barley      | QVALQVALPELDGMEPIVFAGRDPRSKPQLLRKSHALHKRVEQLCIRAIRWCELKRRKTKAEKKLAITVFSFPDPKGNVGTAAVYLVNFAS    | 526  |
| Rice        | QVALQVALPELDGMEPIVFAGRDPRTEGK.....SHALHKRVEQLCIRAIRWCELKRRKTKAEKKLAITVFSFPDPKGNVGTAAVYLVNFAS   | 532  |
| Soybean     | QVALQVALPELDGMEPIVFAGRDPRTEGK.....SHALHKRVEQLCIRAIRWCELKRRKTKAEKKLAITVFSFPDPKGNVGTAAVYLVNFAS   | 528  |
| Arabidopsis | IYSVLRDLKRDGYNVEGLPEETAELIEEIHDKEAQFSSPNLNIAKMNVREYQDLTPYANALEENWGKPPGNLNSDGENLLVYKQYGN        | 616  |
| Tobacco     | IYSVLRDLKRDGYNVEGLPEETAELIEEIHDKEAQFSSPNLNIAKMNVREYQDLTPYATALEENWGKPPGNLNSDGENLLVYKQYGN        | 617  |
| Barley      | IYSVLRDLKRDGYNVEGLPEETAELIEEIHDKEAQFSSPNLNIAKMNVREYQDLTPYANALEENWGKPPGNLNSDGENLLVYKQYGN        | 616  |
| Rice        | IYSVLRDLKRDGYNVEGLPEETAELIEEIHDKEAQFSSPNLNIAKMNVREYQDLTPYANALEENWGKPPGNLNSDGENLLVYKQYGN        | 622  |
| Soybean     | IYSVMKELKRDGYNVEGLPEETAELIEEIHDKEAQFSSPNLNIAKMNVREYQDLTPYATALEENWGKPPGNLNSDGENLLVYKQYGN        | 618  |
| Arabidopsis | VF1GVQPTFGYEGDPMRLFLSKSASPHHGFAAYSYVFEKIFKADAVLHFHGTGSLFEMPGKQVMSDADFSDSLIGNIPNYYVYAAANNSP     | 706  |
| Tobacco     | VF1GVQPTFGYEGDPMRLFLSKSASPHHGFAAYSYVFEKIFKADAVLHFHGTGSLFEMPGKQVMSDADFSDSLIGNIPNYYVYAAANNSP     | 707  |
| Barley      | VF1GVQPTFGYEGDPMRLFLSKSASPHHGFAAYSYVFEKIFKADAVLHFHGTGSLFEMPGKQVMSDADFSDSLIGNIPNYYVYAAANNSP     | 706  |
| Rice        | VF1GVQPTFGYEGDPMRLFLSKSASPHHGFAAYSYVFEKIFKADAVLHFHGTGSLFEMPGKQVMSDADFSDSLIGNIPNYYVYAAANNSP     | 712  |
| Soybean     | VF1GVQPTFGYEGDPMRLFLSKSASPHHGFAAYSYVFEKIFKADAVLHFHGTGSLFEMPGKQVMSDADFSDSLIGNIPNYYVYAAANNSP     | 708  |
| Arabidopsis | EATI AKRRSYANTI SYLTPPAENAGLYKGLQKSELIS SYQSLKDTGRGQIVSSI I STAKQCNLDKDVLDLDEGEELSPKDRD SVVGKV | 796  |
| Tobacco     | EATI AKRRSYANTI SYLTPPAENAGLYKGLQKSELIS SYQSLKDSGRGQIVSSI I STAKQCNLDKDVLDLDEGEELSPKDRD SVVGKV | 797  |
| Barley      | EATI AKRRSYANTI SYLTPPAENAGLYKGLQKSELIS SYQSLKDTGRGQIVSSI I STAKQCNLDKDVLDLDEGEELPANERD LVVGKV | 796  |
| Rice        | EATI AKRRSYANTI SYLTPPAENAGLYKGLQKSELIS SYQSLKDTGRGQIVSSI I STAKQCNLDKDVLDLDEGEELPNRDL LVVGKV  | 802  |
| Soybean     | EATI AKRRSYANTI SYLTPPAENAGLYKGLQKSELIS SYQSLKDTGRGQIVSSI I STAKQCNLDKDVLDLDEGEELIPKDRD LVVGKV | 798  |
| Arabidopsis | YSKIMEIESRLLPCLGHVIGEPSSAIEAVATLVNIAALDRPEDESILASPILAECVGREIEDVYRGSKGIILADVLLRQITEASRGAVS      | 886  |
| Tobacco     | YSKIMEIESRLLPCLGHVIGEPSSAIEAVATLVNIAALDRPEDETSALPSILAECVGREIEDVYRGSKGIILADVLLRQITEASRGAVS      | 887  |
| Barley      | YKGLMEIESRLLPCLGHVIGEPSSAIEAVATLVNIAALDRPEENITSLPGLIAATVGRITIEDVYRGSKGIILADVLLRQITEASRGAVS     | 886  |
| Rice        | YAKIMEIESRLLPCLGHVIGEPSSAIEAVATLVNIAALDRPEDEITYSLPNLIAQTVGRNIEDVYRGSKGIILADVLLRQITEASRGAVS     | 892  |
| Soybean     | YSKIMEIESRLLPCLGHVIGEPSSAIEAVATLVNIAALDRPEDESILASPILAECVGREIEDVYRGSKGIILADVLLRQITEASRGAVS      | 888  |
| Arabidopsis | AFVEKTSINSGQVVDVTKLSLILGFGINPEWVYELNNTKHYRANRDKLRTVFLGCECLKLVVMDNLSLMOALEGKVVPEPGGGDPI         | 976  |
| Tobacco     | AFVEKTSINSGQVVDVTKLSLILGFGINPEWVYELNNTKHYRANRDKLRTVFLGCECLKLVVMDNLSLMOALEGKVVPEPGGGDPI         | 977  |
| Barley      | AFVEKTSINSGQVVDVTKLSLILGFGINPEWVYELNNTKHYRANRDKLRTVFLGCECLKLVVMDNLSLMOALEGKVVPEPGGGDPI         | 976  |
| Rice        | TFVEKTSINSGQVVDVTKLSLILGFGINPEWVYELNNTKHYRANRDKLRTVFLGCECLKLVVMDNLSLMOALEGKVVPEPGGGDPI         | 982  |
| Soybean     | AFVEKTSINSGQVVDVTKLSLILGFGINPEWVYELNNTKHYRANRDKLRTVFLGCECLKLVVMDNLSLMOALEGKVVPEPGGGDPI         | 978  |
| Arabidopsis | RNPKVLPTEGKNIHALDPAIPTTAAAMSAKIVVERLLEKQKADNGGKYPETIALVLWGTDNIKTYGESLAQVLMWIGVPEVADTFGRVNR     | 1066 |
| Tobacco     | RNPKVLPTEGKNIHALDPAIPTTAAAVQSAKIVVERLLEKQKADNGGKYPETIALVLWGTDNIKTYGESLAQVLMWIGVPEVADTFGRVNR    | 1067 |
| Barley      | RNPKVLPTEGKNIHALDPAIPTTAAAMSAKIVVERLLEKQKADNGGKYPETIALVLWGTDNIKTYGESLAQVLMWIGVPEVADTFGRVNR     | 1066 |
| Rice        | RNPKVLPTEGKNIHALDPAIPTTAAALKSAKIVVERLLEKQKADNGGKYPETIALVLWGTDNIKTYGESLAQVLMWIGVPEVADTFGRVNR    | 1072 |
| Soybean     | RNPKVLPTEGKNIHALDPAIPTTAAAMSAKIVVDRLEKQKADNGGKYPETIALVLWGTDNIKTYGESLAQVLMWIGVPEVADTFGRVNR      | 1068 |
| Arabidopsis | VEPVSLEELGRPRIDVWVNCSGVFRDLFINQMNLDRAVKMAELDEPEEQNYVRKHAEQAELGIDIREAATRVFSNAGSYSYSSINIL        | 1156 |
| Tobacco     | VEPVSLEELGRPRIDVWVNCSGVFRDLFINQMNLDRAVKMAELDEPEEQNYVRKHAEQAELGIDIREAATRVFSNAGSYSYSSINIL        | 1157 |
| Barley      | VEPVSLEELGRPRIDVWVNCSGVFRDLFINQMNLDRAVKMAELDEPEEQNYVRKHAEQAELGIDIREAATRVFSNAGSYSYSSINIL        | 1156 |
| Rice        | VEPVSLEELGRPRIDVWVNCSGVFRDLFINQMNLDRAVKMAELDEPEEQNYVRKHAEQAELGIDIREAATRVFSNAGSYSYSSINIL        | 1162 |
| Soybean     | VEPVSLEELGRPRIDVWVNCSGVFRDLFINQMNLDRAVKMAELDEPEEQNYVRKHAEQAELGIDIREAATRVFSNAGSYSYSSINIL        | 1158 |
| Arabidopsis | AVENSSWVNDKQLQDMYLSRKSFAFDSDAPGAGMTEKRVFEMALS TADATFQNLDSSEISLTDVSHYFSDPTNLVQLRDKKPKSSAY       | 1246 |
| Tobacco     | AVENSSWVNDKQLQDMYLSRKSFAFDSDAPGAGMTEKRVFEMALS TADATFQNLDSSEISLTDVSHYFSDPTNLVQLRDKKPKSSAY       | 1247 |
| Barley      | AVENSSWVNDKQLQDMYLSRKSFAFDSDAPGAGMTEKRVFEMALS TADATFQNLDSSEISLTDVSHYFSDPTNLVQLRDKKPKSSAY       | 1246 |
| Rice        | AVENSSWVNDKQLQDMYLSRKSFAFDSDAPGAGMTEKRVFEMALS TADATFQNLDSSEISLTDVSHYFSDPTNLVQLRDKKPKSSAY       | 1252 |
| Soybean     | AVENSSWVNDKQLQDMYLSRKSFAFDSDAPGAGMTEKRVFEMALS TADATFQNLDSSEISLTDVSHYFSDPTNLVQLRDKKPKSSAY       | 1248 |
| Arabidopsis | IADTTTANAQVRTLSETVRLDARTKLLNPKWYEGMSSGYEGVREIEKRLTNTVGSATSQGVNDNWYEEANSTFIODEEMLNRLMNTNE       | 1336 |
| Tobacco     | IADTTTANAQVRTLSETVRLDARTKLLNPKWYEGMLSTGYEGVREIEKRLTNTVGSATSQGVNDNWYEEANSTFIODEEMLNRLMNTNE      | 1337 |
| Barley      | IADTTTANAQVRTLSETVRLDARTKLLNPKWYEGMSSGYEGVREIEKRLTNTVGSATSQGVNDNWYEEANSTFIODEEMLNRLMNTNE       | 1336 |
| Rice        | IADTTTANAQVRTLSETVRLDARTKLLNPKWYEGMSSGYEGVREIEKRLTNTVGSATSQGVNDNWYEEANSTFIODEEMLNRLMNTNE       | 1342 |
| Soybean     | IADTTTANAQVRTLSETVRLDARTKLLNPKWYEGMLSTGYEGVREIEKRLTNTVGSATSQGVNDNWYEEANSTFIODEEMLNRLMNTNE      | 1338 |
| Arabidopsis | NSFRKLLQTFLEANGRGYWETSANIEIKLKQLYSEVEDKIEGID                                                   | 1380 |
| Tobacco     | NSFRKLLQTFLEANGRGYWETSANIEIKLKQLYSEVEDKIEGID                                                   | 1381 |
| Barley      | NSFRKLLQTFLEANGRGYWETSANIEIKLKQLYSEVEDKIEGID                                                   | 1380 |
| Rice        | NSFRKLLQTFLEANGRGYWETSANIEIKLKQLYSEVEDKIEGID                                                   | 1386 |
| Soybean     | NSFRKLLQTFLEANGRGYWETSANIEIKLKQLYSEVEDKIEGID                                                   | 1382 |

**Supplementary Fig. 3** Alignment of the Amino Acid Sequence of Five Mg-Chelatase H Subunits (Identity = 89.30%).

|             |                                                                                             |     |
|-------------|---------------------------------------------------------------------------------------------|-----|
| Arabidopsis | MAMTPVASSSPVSTCRLFRCNLLPDLLPKPLFSLPKRNR IASCRFTVRA . . . SA . NATVE SPNGVPASTSDTDTETDTT     | 76  |
| Tobacco     | . . MGF CSTSTLPQTSLNSNSQSSFTFYLPKPCPILSSTYLRPKRLKFLRI . . . SA . TATIDSPNGAVAVVEPEKQPEKIS   | 74  |
| Barley      | . . . MAAMATALSTSLPH . LPPRRLP SHPVAALS LAPRGFRRRERAPARLA AVASA . SEVLDSTNGAAPAPTS PAPS GQK | 74  |
| Rice        | . . . MAMATTALSASLPRLLPPRRRFPPTSSSSPSAASTSTRVVR LRAAAA SAPSEVLDSTNGAIPSGKGGG . . GQQ .      | 73  |
| Soybean     | . MGFALAYTASGCCSNLQFQSL LFAAASLRSKPCLSLCNSTYRPKRILQR . . . SP . IVGAQSENGALVTSEKPDNTY . . . | 72  |
| Arabidopsis | SYGRQFFPLAAVVGQEGIKTALLGAVDREIGGIAISGRRGTAKTVMARGLHEILPPIEVVVGSI SNADPACDEWEDDL             | 156 |
| Tobacco     | F . GRQYFPLAAVIGQDAIKTALLGAI DREIGGIAICGKRGTAKTLMARGLHAILPPIEVVVGSMANADPNCPDEWEDGL          | 153 |
| Barley      | Y . GREYFPLAAVVGQDAIKTSLLLGAI DREVGGIAISGKRGTAKTVMARGLHAILPPIEVVVGSIANADPNIEEWEEDHL         | 153 |
| Rice        | Y . GREYFPLAAVVGQDAIKTALLGAI DREIGGIAISGKRGTAKTVMARGLHAILPPIEVVVGSIANADPNYEEWEEDGL          | 152 |
| Soybean     | . . GRQYFPLAAVVGQDSIKTALLGAI DPGVGGIAISGKRGTAKTVMARGLHAILPPIEVVVGSIANADPTCEEWEEDGL          | 150 |
| Arabidopsis | DERIEYNADNTIKTEIVKSPFIQIPLGVTE DRLIGSVDVEESVKRGTTFVFPGLLAEAHRGVLYVDEINLLDEGISNLLL           | 236 |
| Tobacco     | ADRAEYGS DGNKTKTQIVKSPFVQIPLGVTE DRLIGSVDVEESVKS GTFVFPGLLAEAHRGVLYVDEINLLDEGISNLLL         | 233 |
| Barley      | ADQVQYDADGNKCEIVKAPFVQIPLGVTE DRLIGSVDVEESVRS GTFVFPGLLAEAHRGVLYVDEINLLDDGISNLLL            | 233 |
| Rice        | ANQVQYDADGNKTEIKTSPFVQIPLGIT E DRLIGSVDVEASVKS GTFVFPGLLAEAHRGVLYVDEINLLDEGVSNLLL           | 232 |
| Soybean     | TECLEYDSTGNIKTRIIKSPFVQIPLGVTE DRLIGSVDVEESVKTGTTFVFPGLLAEAHRGVLYVDEINLLDEGISNLLL           | 230 |
| Arabidopsis | NVLTDEGVNIVEREGISFRHPCKPLLIATYNPEEGAVREHLLDRVA INLSADLPMSEDRVA AVGIATQFQECNEVFRMV           | 316 |
| Tobacco     | NVLTDEGVNIVEREGISFRHPCKPLLIATYNPEEGAVREHLLDRVA INLSADLPMSEDRVA AVDTATRFQECNEVFKMV           | 313 |
| Barley      | NVLTDEGVNIVEREGISFRHPCKPLLIATYNPEEGSVREHLLDRVA INLSADLPLSFDRVA AVNIATQFQESSKDVFKMV          | 313 |
| Rice        | NVLTDEGVNIVEREGISFRHPCKPLLIATYNPEEGSVREHLLDRVA INLSADLPMSEDRVA AVDTATQFQESSKEVFKMV          | 312 |
| Soybean     | NVLTDEGVNIVEREGISFKHPCRP LLIATYNPEEGAVREHLLDRVA INLSADLPMSEFENRVA AVGIATEFQENSSQVFEMV       | 310 |
| Arabidopsis | NEETE TAKTQIILAREYLKDVKISREQLKYLVL EAVRGGVQGHRAEL YAARVAKCLAAIEGREKVTIDDLRKA VELVILP        | 396 |
| Tobacco     | DEETDSAKTQIILAREYLKDV TISRDLKYLVM EAIRGGCQGHRAEL YAARVAKCLAAIDGREKVGVDLKKAVELVILP           | 393 |
| Barley      | EEETEVAKTQIILAREYLKDVAI STEQLKYLVM EAIRGGCQGHRAEL YAARVAKCLAAIEGREKVF AEDLKKAVELVILP        | 393 |
| Rice        | EEETEVAKTQIILAREYLKDVAI STEQLKYLVM EAIRGGCQGHRAEL YAARVAKCLAAIEGREK . . . . . VELVILP       | 383 |
| Soybean     | EEETDNAKTQIILAREYLKDV TLNREQLKYLVI EALRGGCQGHRAEL FAARVAKCLAAIEGREKVYVDDLKKA VELVILP        | 390 |
| Arabidopsis | RSLSLDETPPEQQN . QPPPPPPPPQN . . . . . SESCEEENEEEQEEEEDE SNEENENEQQDQIPEEFIFDAEGGLVD       | 467 |
| Tobacco     | RSTIVENPPDQQNQPPPPPPPPQN . . . . . QDSSEEQNEEEKEEEDQEDEKDRENEQQQPVDEFIFDAEGGLVD             | 465 |
| Barley      | RSIISDNPEQQN . QPPPPPPPPQNQD NAEDQDEKED . . . . . EKD EEEKEDDE . ENKQDDQIPEEFIFDAEGGLVD     | 468 |
| Rice        | RSILSDNPEQQDQPPPPPPPPPPQDQSDQEDQDEDE . . . . . EEDQEDDE . ENKQDDQIPEEFIFDAEGGLVD            | 453 |
| Soybean     | RSIVTENPPDQQN . QPPPPPPPPQN . . . . . QESCEEQNEEE . . . . . QEDDKDEENEQQEQLEPEEFIFDAEGGLVD  | 456 |
| Arabidopsis | EKLLFFAQAQQRKRGKAGRAKNVIFSEDRGRYIKPMLPKGPFVKRLAVDATLRAAAPYQKLRRKDISGTRKVFVEKTDMR            | 547 |
| Tobacco     | EKLLFFAQAQQRKRGKAGRAKNVIFSEDRGRYIKPMLPKGPFVKRLAVDATLRAAAPYQKLRRAKDIQKTRKVFVEKTDMR           | 545 |
| Barley      | DKLLFFAQAQQRKRGKAGRAKNVIFSEDRGRYIKPMLPKGPFVRR LAVDATLRAAAPYQKLRRKSLDKTRKVFVEKTDMR           | 548 |
| Rice        | EKLLFFAQAQQRKRGKAGRAKNVIFSEDRGRYIGSMLPKGPIRR LAVDATLRAAAPYQKLRRKDRDKTRKVFVEKTDMR            | 533 |
| Soybean     | EKLLFFAQAQQRKRGKAGRAKNVIFSEDRGRYIKPMLPKGPFVKRLAVDATLRAAAPYQKLRRKDSGNRRKVFVEKTDMR            | 536 |
| Arabidopsis | AKRMARKAGALVIFVVDASGSMALNRMQNAKGAALKLLAESYTSRDQVSIIPFRGDAAEVLLPPSRSIAMARNRLERLPC            | 627 |
| Tobacco     | AKRMARKAGALVIFVVDASGSMALNRMQNAKGAALKLLAESYTSRDQVCIIPFRGDAAEVLLPPSRSIAMARNRLERLPC            | 625 |
| Barley      | AKRMARKAGALVIFVVDASGSMALNRMQNAKGAALKLLAESYTSRDQVAIIPFRGDYAEVLLPPSRSIAMARKRLEKLP             | 628 |
| Rice        | AKRMARKAGALVIFVVDASGSMALNRMQNAKGAALKLLAESYTSRDQVSIIPFRGDFAEVLLPPSRSIAMARNRLEKLP             | 613 |
| Soybean     | AKRMARKAGALVIFVVDASGSMALNRMQNAKGAALKLLAESYTSRDQVSIIPFRGDAAEVLLPPSRSIAMARKRLEKLP             | 616 |
| Arabidopsis | GGGSLAHLGTTAVRVGLNAEKSGDVGRIMIVAITDGRANITLKRSTDPESI . APDAPRPTSKELKDEILEVAGKIYKAG           | 706 |
| Tobacco     | GGGSLAHLGTTAVRVGMNAEKSGDVGRIMIVAITDGRANISLKRSTDP EAE . AS . DAPRPSSELKDEILEVAGKIYKI         | 703 |
| Barley      | GGGSLAHLGTTAVRVGLNAEKSGDVGRIMIVAITDGRANVSLKKSNDPEAAAAS . DAPRPSSTQELKDEILDVSAKIFKA          | 707 |
| Rice        | GGGSLAHLGTTAVRVGLNAEKSGDVGRIMIVAITDGRANVSLKKSNDPEAT . . S . DAPRPSSELKDEILEVAGKIYKA         | 690 |
| Soybean     | GGGSLAHLGTTAVRVGLNAEKSGDVGRIMIVAITDGRANISLKRSTDP EAA . AATDAPKPSAQELKDEILEVAGKIYKA          | 695 |
| Arabidopsis | MSLLVIDTENKFVSTGFAKEIARVAQGYYYL PNASDAVISATTRDALSDLKNS                                      | 760 |
| Tobacco     | GMSLLVIDTENKFVSTGFAKEIARVAQGYYYL PNASDAVISAA TKDALSALKE                                     | 757 |
| Barley      | GMSLLVIDTENKFVSTGFAKEIARVAQGYYYL PNASDAVISAA TKTALADLKS                                     | 761 |
| Rice        | GISLLVIDTENKFVSTGFAKEIARVAQGYYYL PNASDAVISAA TKTALS DLKS                                    | 744 |
| Soybean     | GMSLLVIDTENKFVSTGFAKEIARVAQGYYYL PNASDAVISSATKEALSALKS                                      | 749 |

**Supplementary Fig. 4** Alignment of the Amino Acid Sequence of Five Mg-Chelatase D Subunits (Identity = 82.94%).

|             |                                                                                    |     |
|-------------|------------------------------------------------------------------------------------|-----|
| Tabacco     | ..MASLLGTSSSAAAAI LASTPLSSRSCKPAVFSLFP.SSGQSQGRKFYGGIRVPVKGRSQFHVAISNVATEINLLKNR   | 77  |
| Arabidopsis | ..MASLLGTSSSAIWASPSLSSPSKPSSSPICFRPG.KLFGSKLNAGIQIRPKNRSRYHV.SVM..NVATEINSTEQV     | 74  |
| Barley      | MAMASPFSPASAA.AASPALFAVSTSRP.....LSLTTAATAAVSARAPSRTRSGLRGRFVAVC...NVAAPSAAEQET    | 70  |
| Rice        | ..MASAFSPATAAPAASPALFSASTSRP.....LSL.TAAAAAVSARIPSRRGF..RRGRFTVC...NVAAPSATQOEA    | 66  |
| Soybean     | ..MASALGTSSIAVLPSTRYF...SSSSKPSIHTLSL.TSGQNYGRKFYGGIGIHGIKGRAQLSVT...NVATEVNSVEQA  | 72  |
| Tabacco     | V.RNL.LEESQRPVYPFAAIVGQDEMCLCLLNVIDPKIGGVMIMGDRGTGKSTTVRSLVDLLPEIKVISGDFNFNSDPDD   | 155 |
| Arabidopsis | V.GKFDSKKSARPVYPFAAIVGQDEMCLCLLNVIDPKIGGVMIMGDRGTGKSTTVRSLVDLLPEINVVAGDPYNSDPID    | 153 |
| Barley      | KPAAA.AKESQRPVYPFAAIVGQDEMCLCLLNVIDPKIGGVMIMGDRGTGKSTTVRSLVDLLPDISVVVGDPFNSDPYD    | 149 |
| Rice        | K.AAG.AKESQRPVYPFAAIVGQDEMCLCLLNVIDPKIGGVMIMGDRGTGKSTTVRSLVDLLPDIRVVVGDPFNSDPDD    | 144 |
| Soybean     | Q.SIA.SKESQRPVYPFAAIVGQDEMCLCLLNVIDPKIGGVMIMGDRGTGKSTTVRSLVDLLPEIKVVAGDPYNSDPQD    | 150 |
| Tabacco     | QEVMSAEVRDKLRSGQQLPISRKINMVDLPLGATEDRVCCTIDIEKALTEGVKAFEPGLLAKANRGILYVDEVNLLDDH    | 235 |
| Arabidopsis | PEFMGVEVRERVEKGEQVPVIATKINMVDLPLGATEDRVCCTIDIEKALTEGVKAFEPGLLAKANRGILYVDEVNLLDDH   | 233 |
| Barley      | PEVMGPEVRDRLLKGESLPVTTTKITMVDLPLGATEDRVCCTIDIDKALTEGVKAFEPGLLAKANRGILYVDEVNLLDDH   | 229 |
| Rice        | PEVMGPEVRERVLEGEKLPVVTAKITMVDLPLGATEDRVCCTIDIEKALTEGVKAFEPGLLAKANRGILYVDEVNLLDDH   | 224 |
| Soybean     | PEFMGVEVRERVLQGEELSVLTKINMVDLPLGATEDRVCCTIDIEKALTEGVKAFEPGLLAKANRGILYVDEVNLLDDH    | 230 |
| Tabacco     | LVDVLLDSAASGWNTVEREGISISHPARFILIGSGNPEEGELRPQLLDRFGMHAQVGTVRDAELRVKIVEERARFDPK     | 315 |
| Arabidopsis | LVDVLLDSAASGWNTVEREGISISHPARFILIGSGNPEEGELRPQLLDRFGMHAQVGTVRDADLRVKIVEERARFDSNPK   | 313 |
| Barley      | LVDVLLDSAASGWNTVEREGISISHPARFILIGSGNPEEGELRPQLLDRFGMHAQVGTVRDAELRVKIVEERARFDRDPK   | 309 |
| Rice        | LVDVLLDSAASGWNTVEREGISISHPARFILIGSGNPEEGELRPQLLDRFGMHAQVGTVRDAELRVKIVEERARFDRDPK   | 304 |
| Soybean     | LVDVLLDSAASGWNTVEREGISISHPARFILIGSGNPEEGELRPQLLDRFGMHAQVGTVRDAELRVKIVEERARFDPK     | 310 |
| Tabacco     | EFRESYKAEQEKLNQIDSARNALSAVTIDHDLRVKISKVCAELNVDGLRGDIVTNRAAKALAAALKGRDVTPEDIATVI    | 395 |
| Arabidopsis | DFRDTYKTEQDKLQDQISTARANLSSVQIDRELKVKISRVCSSELNVDGLRGDIVTNRAAKALAAALKGRDVTPEDDVATVI | 393 |
| Barley      | TFRQSYLEEQDKLQEQITSARSNLGSVQLDHDLRVKISQVCSSELNVDGLRGDIVTNRAAKALAAALKGRDVTVEDISTVI  | 389 |
| Rice        | AFRESYLEEQDKLQEQISSARSNLGAVQIDHDLRVKISKVCAELNVDGLRGDIVTNRAAKALAAALKGRDVTIVEDIATVI  | 384 |
| Soybean     | EFRDSYKAEQEKLQEQITSARSVLSVQIDQLKVKISKVCAELNVDGLRGDIVTNRAAKALAAALKGRDNVSAEDIATVI    | 390 |
| Tabacco     | PNCLRHRRLRKDPLESIDSGVLVVEKFYEVF                                                    | 425 |
| Arabidopsis | PNCLRHRRLRKDPLESIDSGVLVSEKFAEIF                                                    | 423 |
| Barley      | PTVLRHRRLRKDPLESIDSGLLVVEKFYEVF                                                    | 419 |
| Rice        | PNCLRHRRLRKDPLESIDSGLLVVEKFYEVF                                                    | 414 |
| Soybean     | PNCLRHRRLRKDPLESIDSGLLVTEKFYEVF                                                    | 420 |

**Supplementary Fig. 5** Alignment of the Amino Acid Sequence of Five Mg-Chelatase I Subunits (Identity = 82.74%).

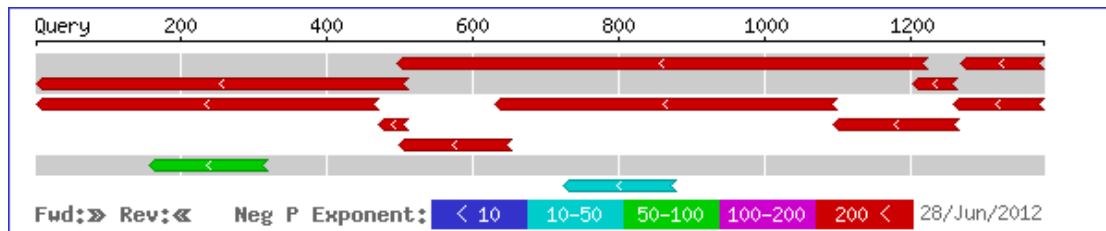

1. Alignment summary of CHLH from *Arabidopsis thaliana* and *Nicotiana benthamiana*

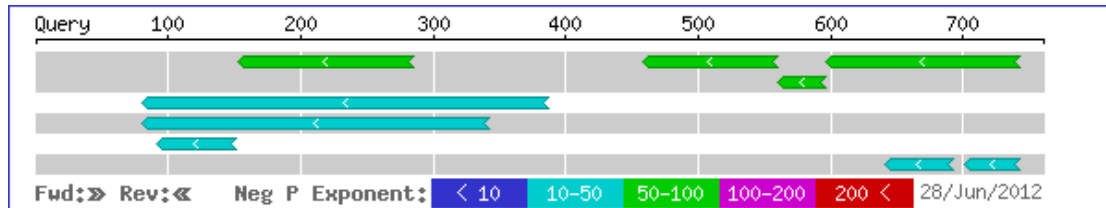

2. Alignment summary of CHLD from *Arabidopsis thaliana* and *Nicotiana benthamiana*

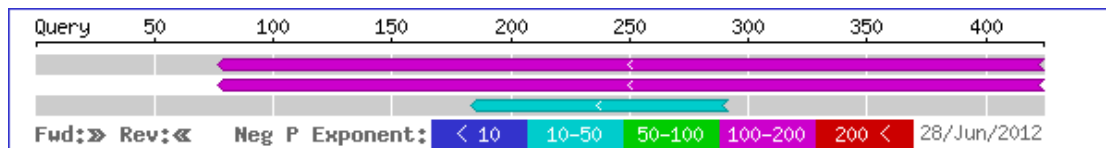

3. Alignment summary of CHLI from *Arabidopsis thaliana* and *Nicotiana benthamiana*

**Supplementary Fig. 6** Alignment of the Amino Acid Sequence of Mg-Chelatase H, D and I Subunits of *Arabidopsis thaliana* and *Nicotiana benthamiana*.

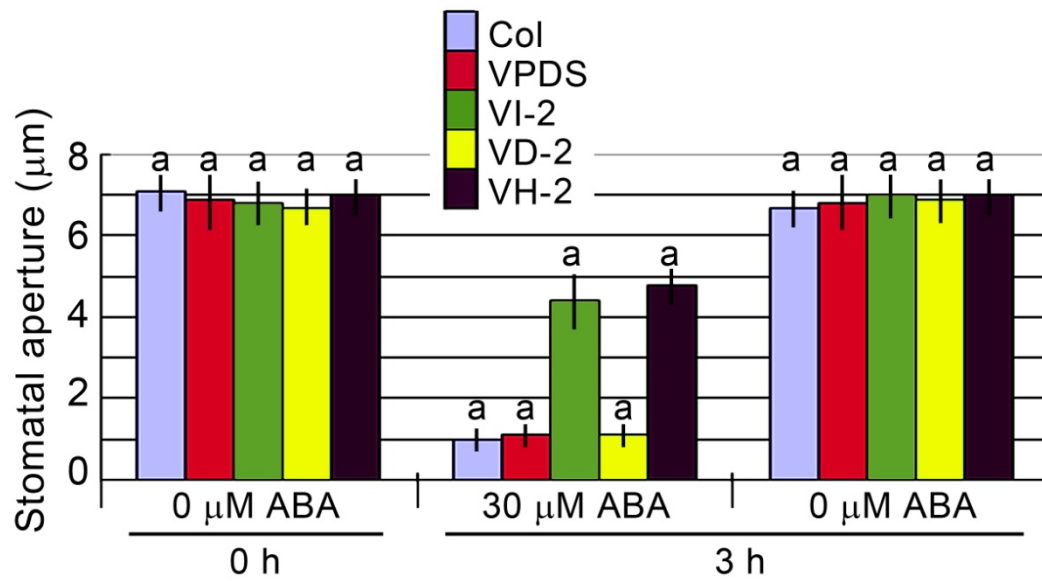

**Supplementary Fig. 7** ABA-induced stomatal closure in the VIGS transgenic tobacco leaves. WT, wild-type plants; VPDS, VI-2, VD-2 and VH-2, the same transgenic lines as described in Fig. 5a. Stomatal aperture was assayed in the ABA-free medium (0 µM ABA) and ABA-containing medium (30 µM). Values are the means  $\pm$  SE from three independent experiments and different letters indicate significant differences at  $P < 0.05$  (Duncan's multiple range test) when comparing values within the same ABA concentration.  $n = 60$  apertures per experiment.
